# Supplementary material for: Lipoprotein Deprivation Reveals a Cholesterol-Dependent Therapeutic Vulnerability in Diffuse Glioma Metabolism
Source: MDPI journal article supplement (doi:10.3390/cancers14163873), 2022-08-11
Supplement: s1 [file s1]

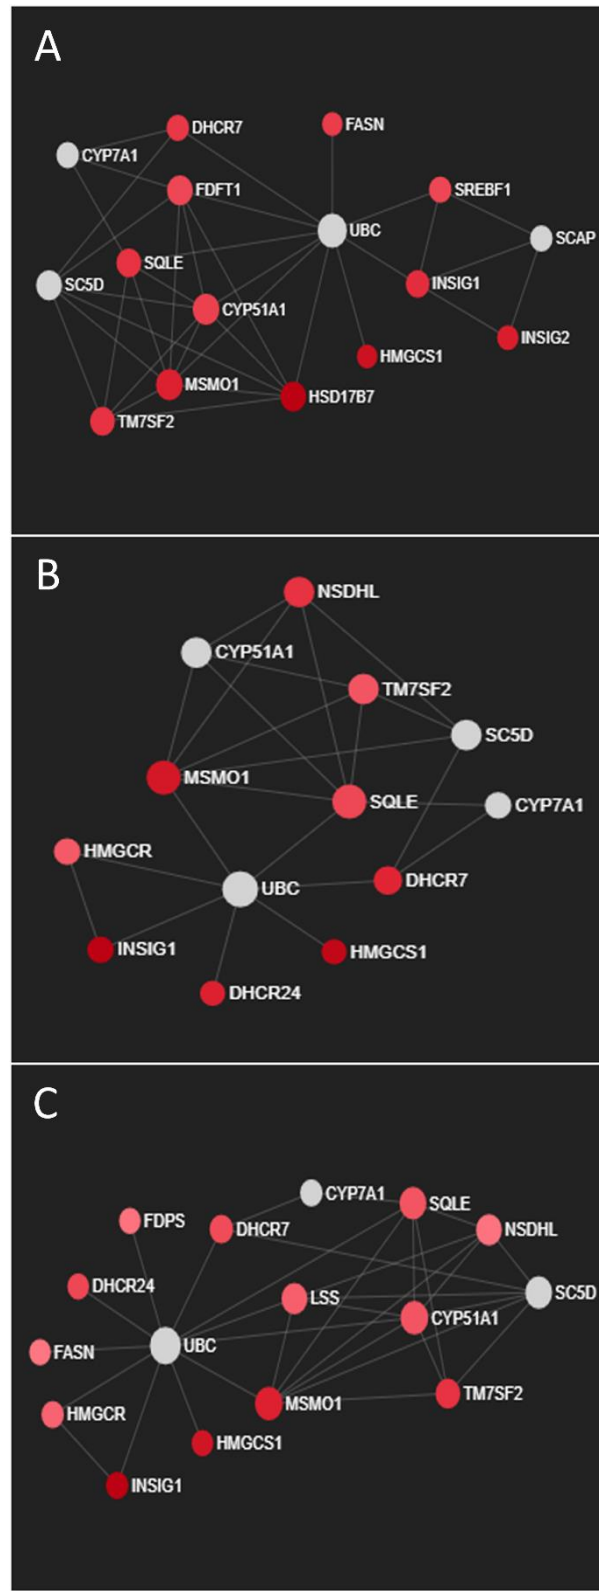

**Supplementary Figure S1. Cholesterol-related transcriptomic networks induced by lipoprotein deprivation.** Extent of upregulated gene expression in U373 (A), KNS42 (B), and

SF188 (C) cells represented by red colour intensity. Grey nodes represent non-significant genes required to construct the minimum network connecting all indicated significant genes.

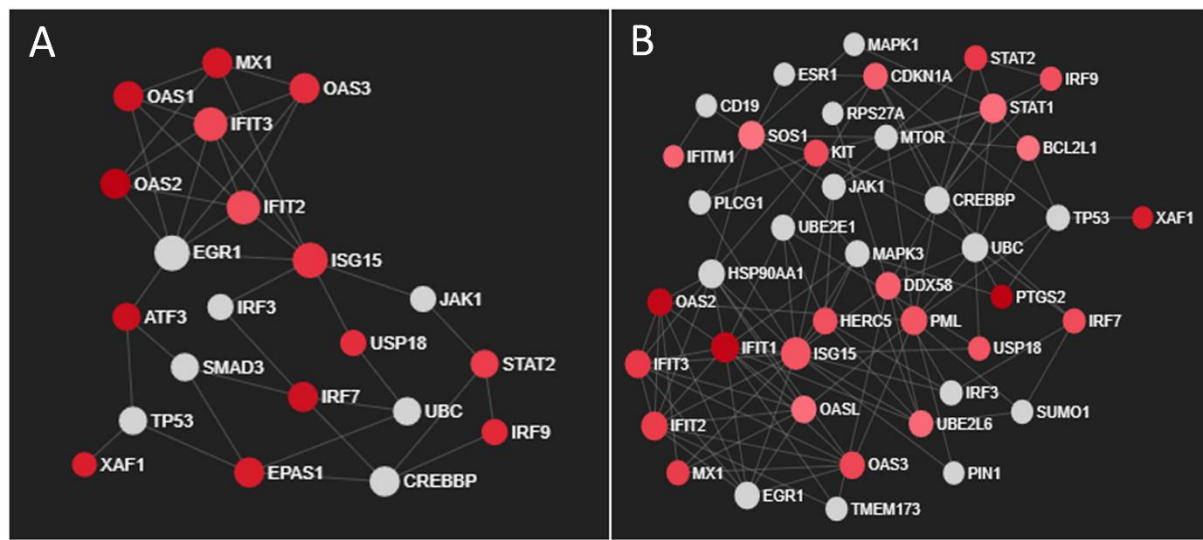

**Supplementary Figure S2. Interferon-related transcriptomic networks induced by lipoprotein deprivation.** Extent of upregulated gene expression in KNS42 (A) and SF188 (B) cells represented by red colour intensity. Grey nodes represent non-significant genes required to construct the minimum network connecting all indicated significant genes.

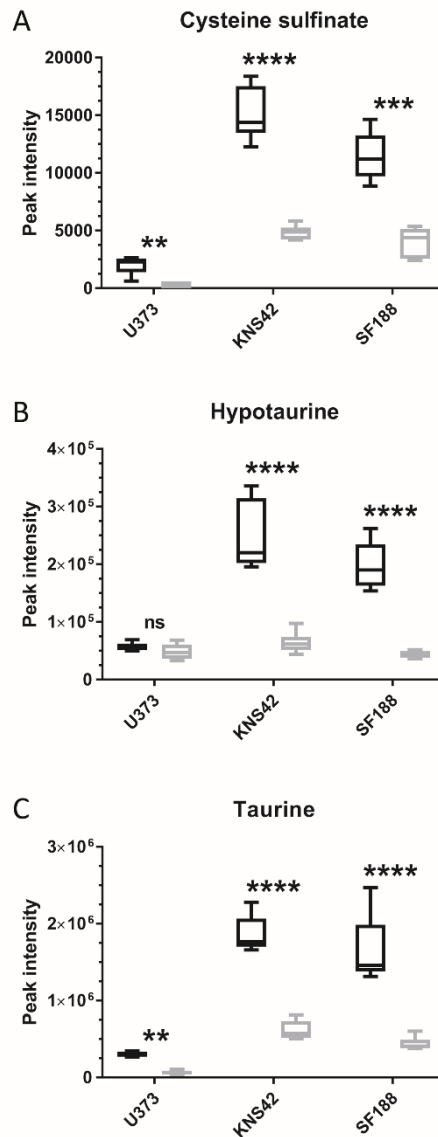

**Supplementary Figure S3. Peak intensities of cysteine sulfinic acid, hypotaurine, and taurine in diffuse glioma cells starved of lipoproteins.** Mean peak intensities are displayed for taurine-related metabolites under lipoprotein-replete (NM; red) or -deplete (LPDM; green) conditions in U373, KNS42, and SF188 cells. Results are the mean  $\pm$  SD of n=6 independent replicates. Statistical evaluation was performed using a *t*-test: ns = not significant; \*  $p < 0.05$ ; \*\*  $p < 0.01$ ; \*\*\*  $p < 0.001$ ; \*\*\*\*  $p < 0.0001$ .

**Supplementary Table S1. Peak intensity fold changes for metabolites within the glycolysis pathway, tricarboxylic acid cycle, and amino acid metabolism under lipoprotein-replete relative to lipoprotein-deplete conditions.**

| Metabolite                   | ID<br>confidence | U373   |          | KNS42  |          | SF188  |          |
|------------------------------|------------------|--------|----------|--------|----------|--------|----------|
|                              |                  | log2FC | FDR      | log2FC | FDR      | log2FC | FDR      |
| Glycolysis                   |                  |        |          |        |          |        |          |
| D-Glucose 6-phosphate        | 10               | -0.04  | 9.20E-01 | 0.01   | 9.99E-01 | -0.24  | 4.83E-01 |
| D-Glyceraldehyde 3-phosphate | 8                | 2.45   | 2.12E-05 | 0.06   | 9.95E-01 | -1.60  | 5.22E-02 |
| 3-Phospho-D-glycerate        | 8                | -0.92  | 8.53E-02 | -0.12  | 8.93E-01 | -0.01  | 4.94E-01 |
| Phosphoenolpyruvate          | 8                | -1.53  | 2.06E-02 | -0.09  | 9.97E-01 | 0.90   | 2.16E-01 |
| Pyruvate                     | 8                | -0.36  | 3.28E-01 | -1.20  | 2.00E-02 | -1.66  | 5.10E-03 |
| Lactate                      | 10               | 0.70   | 7.73E-02 | 0.01   | 9.91E-01 | -0.15  | 6.45E-01 |
| Tricarboxylic acid cycle     |                  |        |          |        |          |        |          |
| Citrate                      | 8                | 0.50   | 8.52E-02 | 0.35   | 3.62E-02 | 0.38   | 5.82E-02 |
| Succinate                    | 10               | -1.63  | 6.11E-05 | -0.79  | 1.58E-02 | 0.20   | 1.11E-01 |
| Malate                       | 10               | -0.10  | 6.78E-01 | -0.34  | 2.56E-02 | -0.66  | 2.43E-04 |
| Energetics                   |                  |        |          |        |          |        |          |
| ADP                          | 10               | 0.21   | 7.36E-01 | 0.24   | 7.33E-01 | 0.12   | 7.58E-01 |
| ATP                          | 8                | 0.80   | 4.17E-02 | -0.05  | 9.72E-01 | 0.38   | 4.14E-01 |
| NAD+                         | 8                | 0.57   | 3.22E-01 | 0.17   | 6.44E-01 | 0.28   | 1.92E-01 |
| NADH                         | 8                | -0.04  | 9.98E-01 | -0.28  | 2.84E-01 | -0.28  | 5.32E-02 |
| NADPH                        | 8                | 0.21   | 7.25E-01 | -0.05  | 8.45E-01 | -0.30  | 5.29E-01 |
| Essential amino acids        |                  |        |          |        |          |        |          |
| L-Histidine                  | 10               | 0.11   | 4.60E-01 | 0.28   | 5.01E-02 | 0.44   | 2.72E-03 |
| L-Isoleucine                 | 10               | 0.13   | 1.15E-01 | 0.11   | 2.56E-01 | 0.31   | 1.89E-03 |
| L-Lysine                     | 8                | 0.27   | 4.42E-01 | 0.14   | 8.04E-01 | 0.23   | 5.22E-01 |
| L-Methionine                 | 10               | 0.08   | 1.88E-01 | 0.13   | 1.25E-01 | 0.31   | 8.67E-05 |
| L-Threonine                  | 10               | 0.21   | 3.47E-02 | 0.28   | 5.71E-04 | 0.24   | 1.14E-03 |
| L-Tryptophan                 | 10               | 0.16   | 2.03E-01 | 0.23   | 1.20E-02 | 0.36   | 2.13E-04 |
| L-Valine                     | 8                | 0.06   | 5.87E-01 | 0.18   | 7.20E-02 | 0.33   | 9.60E-04 |
| Conditional amino acids      |                  |        |          |        |          |        |          |
| L-Arginine                   | 10               | -0.03  | 9.20E-01 | -0.09  | 6.40E-01 | 0.18   | 3.47E-01 |
| L-Cysteine                   | 8                | -0.16  | 8.82E-01 | 0.70   | 1.67E-01 | 0.42   | 3.37E-01 |
| L-Glutamine                  | 10               | -0.07  | 7.31E-01 | 0.41   | 6.39E-03 | 0.38   | 7.99E-03 |
| L-Tyrosine                   | 10               | 0.28   | 3.15E-02 | 0.45   | 1.00E-03 | 0.62   | 1.33E-04 |
| Glycine                      | 10               | 0.40   | 7.84E-02 | 0.36   | 9.47E-02 | 0.84   | 9.84E-04 |
| L-Proline                    | 10               | 0.29   | 2.89E-02 | 0.21   | 6.99E-02 | 0.48   | 7.22E-04 |
| L-Serine                     | 10               | -0.54  | 1.12E-02 | -0.53  | 3.48E-04 | -0.55  | 1.46E-03 |
| Non-essential amino acids    |                  |        |          |        |          |        |          |
| L-Alanine                    | 8                | -0.37  | 9.35E-02 | -0.73  | 4.16E-04 | -0.76  | 2.10E-05 |
| L-Asparagine                 | 10               | -0.14  | 1.65E-01 | 0.42   | 6.84E-03 | 0.72   | 4.14E-04 |
| L-Aspartate                  | 10               | -0.12  | 3.44E-01 | 0.25   | 1.65E-01 | 0.22   | 5.32E-02 |
| L-Glutamate                  | 10               | 0.21   | 8.98E-02 | 0.19   | 1.64E-01 | 0.33   | 8.38E-04 |

Fold change differences are given to the base of 2 (log2FC). Statistical evaluation was performed using *t*-test and *p*-values were corrected for multiple comparisons using the false discovery rate (FDR). Significant scores are highlighted in bold.

**Supplementary Table S2. Peak intensity fold changes for metabolites within the methionine cycle, proline synthesis pathway, and choline metabolism under lipoprotein-replete relative to lipoprotein-deplete conditions.**

| Metabolite                                      | ID<br>confidence | U373   |                 | KNS42  |                 | SF188  |                 |
|-------------------------------------------------|------------------|--------|-----------------|--------|-----------------|--------|-----------------|
|                                                 |                  | log2FC | FDR             | log2FC | FDR             | log2FC | FDR             |
| <b>Methionine cycle/transulfuration pathway</b> |                  |        |                 |        |                 |        |                 |
| L-Methionine                                    | 10               | 0.08   | 1.88E-01        | 0.13   | 1.25E-01        | 0.31   | <b>5.60E-02</b> |
| S-Adenosyl-L-methionine                         | 8                | 0.43   | 7.05E-01        | 0.10   | 9.42E-01        | -0.19  | 8.94E-01        |
| S-Adenosyl-L-homocysteine                       | 8                | -0.14  | 9.02E-01        | -0.09  | 8.41E-01        | 0.39   | 4.35E-01        |
| L-Serine                                        | 10               | -0.54  | <b>1.12E-02</b> | -0.53  | <b>3.48E-04</b> | -0.55  | <b>1.46E-03</b> |
| L-Cystathionine                                 | 10               | -1.02  | <b>9.66E-03</b> | -0.78  | <b>5.32E-04</b> | -0.92  | <b>7.75E-03</b> |
| L-Cysteine                                      | 8                | -0.16  | 8.82E-01        | 0.70   | 1.67E-01        | 0.42   | 3.37E-01        |
| Glycine                                         | 10               | 0.40   | 7.84E-02        | 0.36   | 9.47E-02        | 0.84   | <b>9.84E-04</b> |
| γ-L-Glutamyl-L-cysteine                         | 8                | 0.10   | 9.64E-01        | 0.11   | 9.85E-01        | 0.29   | 6.97E-01        |
| Glutathione                                     | 8                | 0.16   | 9.44E-01        | -0.35  | 4.40E-01        | -0.74  | 5.98E-02        |
| Glutathione disulfide                           | 10               | 0.55   | 2.25E-01        | 0.14   | 6.09E-01        | 0.13   | 7.75E-01        |
| L-Cysteine sulfinic acid                        | 7                | -2.69  | <b>1.30E-03</b> | -1.64  | <b>2.46E-06</b> | -1.50  | <b>8.68E-04</b> |
| Hypotaurine                                     | 8                | -0.22  | 3.28E-01        | -1.94  | <b>5.19E-05</b> | -2.18  | <b>2.32E-06</b> |
| Taurine                                         | 10               | -2.16  | <b>1.16E-03</b> | -1.60  | <b>2.61E-05</b> | -1.92  | <b>1.57E-05</b> |
| <b>Proline metabolism pathway</b>               |                  |        |                 |        |                 |        |                 |
| Glutamine                                       | 10               | -0.07  | 7.31E-01        | 0.41   | <b>6.39E-03</b> | 0.38   | <b>7.99E-03</b> |
| L-Glutamate                                     | 10               | 0.21   | 8.98E-02        | 0.19   | 1.64E-01        | 0.33   | <b>8.38E-04</b> |
| L-Glutamate 5-semialdehyde                      | 8                | -3.14  | <b>6.11E-05</b> | -1.94  | <b>8.49E-05</b> | -2.22  | <b>1.17E-07</b> |
| 1-Pyrroline-5-carboxylate                       | 8                | 0.18   | 3.21E-01        | 0.33   | <b>2.79E-02</b> | 0.58   | <b>1.43E-04</b> |
| L-Proline                                       | 10               | 0.29   | <b>2.89E-02</b> | 0.21   | 6.99E-02        | 0.48   | <b>7.22E-04</b> |
| <b>Choline metabolism pathway</b>               |                  |        |                 |        |                 |        |                 |
| Glycerophosphocholine                           | 10               | -0.11  | 2.95E-01        | -0.34  | <b>3.70E-02</b> | -0.56  | <b>9.41E-04</b> |
| Choline                                         | 8                | -0.99  | <b>1.59E-02</b> | -1.33  | <b>4.13E-03</b> | -1.34  | <b>5.95E-06</b> |
| Choline phosphate                               | 10               | -1.09  | <b>1.11E-03</b> | 0.00   | 9.91E-01        | -0.03  | 9.10E-01        |
| CDP-choline                                     | 8                | 0.80   | 3.34E-01        | 0.94   | <b>2.56E-02</b> | 1.47   | <b>3.32E-04</b> |

Fold change differences are given to the base of 2 (log2FC). Statistical evaluation was performed using *t*-test and *p*-values were corrected for multiple comparisons using the false discovery rate (FDR). Significant scores are highlighted in bold.

**Supplementary Table S3. Peak intensity fold changes for metabolites within the methionine cycle, proline synthesis pathway, and choline metabolism under lipoprotein-replete relative to lipoprotein-deplete conditions.**

| Metabolite                         | ID<br>confidence | U373   |                 | KNS42  |                 | SF188  |                 |
|------------------------------------|------------------|--------|-----------------|--------|-----------------|--------|-----------------|
|                                    |                  | log2FC | FDR             | log2FC | FDR             | log2FC | FDR             |
| <b><i>Building blocks</i></b>      |                  |        |                 |        |                 |        |                 |
| Ribose 5-phosphate                 | 10               | 0.56   | 7.93E-01        | 0.66   | 9.51E-02        | 1.10   | <b>7.06E-03</b> |
| Glutamine                          | 10               | -0.07  | 7.31E-01        | 0.41   | <b>6.39E-03</b> | 0.38   | <b>7.99E-03</b> |
| Glycine                            | 10               | 0.40   | 7.84E-02        | 0.36   | 9.47E-02        | 0.84   | <b>9.84E-04</b> |
| Aspartate                          | 10               | -0.12  | 3.44E-01        | 0.25   | 1.65E-01        | 0.22   | 5.32E-02        |
| <b><i>Purine synthesis</i></b>     |                  |        |                 |        |                 |        |                 |
| FGAR                               | 8                | -0.54  | 1.21E-01        | -1.72  | <b>1.96E-02</b> | -3.18  | <b>6.89E-06</b> |
| IMP                                | 10               | 0.33   | 5.38E-01        | -0.20  | 6.49E-01        | -0.65  | 5.48E-02        |
| GMP                                | 10               | 0.47   | 4.67E-01        | -0.11  | 7.98E-01        | -0.53  | 1.91E-01        |
| AMP                                | 10               | 0.07   | 8.82E-01        | -0.49  | 1.61E-01        | -0.92  | <b>2.92E-03</b> |
| ADP                                | 10               | 0.21   | 7.36E-01        | 0.24   | 7.33E-01        | 0.12   | 7.58E-01        |
| ATP                                | 8                | 0.80   | <b>4.17E-02</b> | -0.05  | 9.72E-01        | 0.38   | 4.14E-01        |
| <b><i>Purine degradation</i></b>   |                  |        |                 |        |                 |        |                 |
| Adenosine                          | 10               | -0.77  | <b>3.40E-02</b> | -0.72  | 9.47E-02        | -0.90  | <b>3.07E-02</b> |
| Guanosine                          | 10               | -0.81  | 1.68E-01        | -0.55  | 5.09E-01        | -0.37  | 4.96E-01        |
| Hypoxanthine                       | 10               | -0.60  | <b>3.99E-02</b> | -0.20  | 7.74E-01        | 0.47   | 5.72E-01        |
| Xanthine                           | 10               | 2.34   | <b>4.98E-03</b> | 3.35   | <b>7.39E-05</b> | 4.42   | <b>9.42E-06</b> |
| Uric acid                          | 10               | -4.65  | <b>7.63E-05</b> | -3.09  | <b>5.94E-05</b> | -3.50  | <b>1.05E-05</b> |
| <b><i>Pyrimidine synthesis</i></b> |                  |        |                 |        |                 |        |                 |
| Carbamoylaspartate                 | 8                | 0.03   | 9.98E-01        | -0.82  | <b>2.07E-02</b> | -1.83  | <b>1.26E-04</b> |
| Dihydroorotate                     | 8                | -0.04  | 9.04E-01        | -1.00  | <b>7.60E-03</b> | -2.09  | <b>1.43E-04</b> |
| Orotate                            | 10               | -0.75  | 6.14E-02        | -0.90  | <b>2.31E-02</b> | -1.94  | <b>5.84E-04</b> |
| UMP                                | 10               | 0.31   | 7.02E-01        | 0.52   | 6.58E-01        | 0.48   | 6.28E-01        |
| UDP                                | 10               | -0.35  | 8.90E-01        | 0.45   | 4.67E-01        | 0.42   | 1.34E-01        |
| <b><i>Salvage pathways</i></b>     |                  |        |                 |        |                 |        |                 |
| Hypoxanthine                       | 10               | -0.60  | <b>3.99E-02</b> | -0.20  | 7.74E-01        | 0.47   | 5.72E-01        |
| Adenine                            | 10               | 0.22   | 6.85E-01        | -0.22  | 5.66E-01        | -0.38  | 7.37E-02        |
| Cytidine                           | 8                | 0.34   | 3.21E-01        | -0.19  | 5.69E-01        | 0.29   | 5.41E-01        |
| Thymine                            | 10               | -0.04  | 8.35E-01        | 0.54   | 1.97E-01        | 1.08   | <b>4.85E-04</b> |
| Uridine                            | 8                | -0.25  | 5.71E-01        | -0.13  | 6.27E-01        | 0.16   | 6.12E-01        |

Fold change differences are given to the base of 2 (log2FC). Statistical evaluation was performed using *t*-test and *p*-values were corrected for multiple comparisons using the false discovery rate (FDR). Significant scores are highlighted in bold.

**Supplementary Table S4. Gene ontology analysis of differentially expressed genes in LXR-623 treated U373 cells.**

| GO.ID      | Term                              | Annotated | Significant | Expected | classicFisher | weight01KS | Genes                                                                                                                                                                                                                                                                       |
|------------|-----------------------------------|-----------|-------------|----------|---------------|------------|-----------------------------------------------------------------------------------------------------------------------------------------------------------------------------------------------------------------------------------------------------------------------------|
| GO:0006915 | apoptotic process                 | 1100      | 103         | 49.63    | 8.80E-14      | 8.80E-03   | <i>NOG, VEGFA, GDF15, CSF2, <b>ID3</b>, ADM, CHAC1, <b>EDNRB</b>, NDRG1, ASNS, DDIT3, <b>TAF9B</b>, <b>ID1</b>, MT3, PPP1R15A, <b>CNR1</b>, PHLDA2, IER3, <b>PDGFRB</b>, TBX3, F3, IRS2, ICAM1, CTH, USP53, MKNK2, MYC, KITLG, FAM162A, TRIB3</i>                           |
| GO:0042127 | regulation of cell proliferation  | 903       | 92          | 40.74    | 1.80E-14      | 1.93E-02   | <i>NOG, VEGFA, CSF2, CXCL8, ADM, <b>EDNRB</b>, <b>PDGFRA</b>, NDRG1, LIF, <b>ID1</b>, E2F7, PHLDA2, <b>PDGFRB</b>, TBX3, MXI1, F3, IRS2, ADAMTS1, MYC, KITLG, NAMPT, <b>TXNIP</b>, ARHGEF2, CEBPB, SPRY2, HMOX1, <b>S100B</b>, <b>ASPM</b>, <b>PDE5A</b></i>                |
| GO:0008283 | cell proliferation                | 1124      | 107         | 50.71    | 7.70E-15      | 2.02E-02   | <i>NOG, VEGFA, CSF2, CXCL8, ADM, <b>EDNRB</b>, <b>PDGFRA</b>, NDRG1, LIF, <b>IGF4</b>, <b>ID1</b>, <b>NDP</b>, MT3, E2F7, PHLDA2, <b>PDGFRB</b>, TBX3, MXI1, F3, IRS2, ADAMTS1, MYC, KITLG, NAMPT, <b>TXNIP</b>, ARHGEF2, CEBPB, SPRY2, HMOX1, <b>S100B</b></i>             |
| GO:0042325 | regulation of phosphorylation     | 843       | 85          | 38.03    | 4.20E-13      | 3.93E-02   | <i>NOG, VEGFA, GDF15, CSF2, <b>EDNRB</b>, <b>PDGFRA</b>, LIF, <b>ID1</b>, MT3, DUSP5, <b>PIK3R3</b>, PPP1R15A, SESN2, SRPK2, <b>PDGFRB</b>, SPINK1, IRS2, SEMA7A, ICAM1, MYC, KITLG, TRIB3, ARHGEF2, SPRY2, GPRC5A, <b>PDE5A</b>, DDIT4, TNFRSF10B, <b>CENPE</b>, SPRY4</i> |
| GO:0035556 | intracellular signal transduction | 1501      | 133         | 67.72    | 3.90E-16      | 1.53E-01   | <i>ABCA1, VEGFA, GDF15, CSF2, CXCL8, ADM, CHAC1, <b>EDNRB</b>, <b>PDGFRA</b>, NDRG1, <b>SESN3</b>, LIF, RND3, DDIT3, <b>TAF9B</b>, <b>ID1</b>, <b>LPAR4</b>, EIF4EBP1, MT3, E2F7, DUSP5, PPP1R15A, SESN2, IER3, <b>PDGFRB</b>, <b>SPAAR</b>, SPINK1, F3, IRS2, SEMA7A</i>   |

Statistical evaluation of gene ontology (GO) categories based of the number of significant-to-expected observations using either Fisher's exact test (Fis) or Kolmogorov-Smirnov test (KS). Classic and weight01 algorithms were utilised which do not or do take into account of the structure of the GO hierarchy, respectively. Genes in bold were downregulated under lipoprotein-deplete conditions.



**Supplementary Table S5. Gene ontology analysis of differentially expressed genes in LXR-623 treated KNS42 cells.**

| GO.ID      | Term                                 | Annotated | Significant | Expected | classicFisher | weight01KS | Genes                                                                                                                                                                                                                |
|------------|--------------------------------------|-----------|-------------|----------|---------------|------------|----------------------------------------------------------------------------------------------------------------------------------------------------------------------------------------------------------------------|
| GO:0007062 | sister chromatid cohesion            | 113       | 65          | 23.04    | 3.70E-18      | 1.70E-16   | <i>NDC80, CENPI, CENPE, SKA2, TNKS, ZWILCH, BIRC5, SPC24, KNTC1, FEN1, KIF18A, KNLI, AURKB, CENPK, CENPU, BUB1, CENPL, SPC25, MAD2L1, MIS12, DSN1, SGO1, CDCA8, CHTF8, CENPM, POGZ, CENPC, SLF1, CENPF, DSCC1</i>    |
| GO:0051301 | cell division                        | 434       | 165         | 88.51    | 4.50E-18      | 1.90E-15   | <i>HMCN1, CCNE2, NDC80, KIF11, CENPE, CCNA2, BRIP1, ASPM, NUSAP1, NCAPG, HELLS, BRCA2, KIF20A, CDC6, OIP5, SKA2, ANLN, SMC2, TNKS, ZWILCH, SKA3, BIRC5, SPAG5, SPC24, KNTC1, KIF4A, TPX2, TOP2A, CCNB1, CDCA2</i>    |
| GO:0006260 | DNA replication                      | 239       | 101         | 48.74    | 6.80E-15      | 5.30E-05   | <i>CLSPN, CCNE2, GINS2, RFWDD3, BMP4, POLQ, RMI1, BRIP1, DTL, TICRR, BRCA2, CDC6, ORC1, PCLAF, MCM8, GMNN, RRM2, MCM10, GINS1, CHAF1B, CHEK1, EXO1, POLA2, DNA2, FEN1, RRM1, PCNA, ESCO2, CDC7, POLA1</i>            |
| GO:0007049 | cell cycle                           | 1372      | 450         | 279.8    | < 1e-30       | 0.00025    | <i>SKP2, HMCN1, CLSPN, DLGAP5, CCNE2, GINS2, NDC80, KIF11, STIL, CENPI, RFWDD3, DIRA53, BMP4, RBL1, CENPE, MKI67, WDR76, CCNA2, PDGFRB, BRIP1, ASPM, NUSAP1, HMMR, NCAPG, DTL, FANCI, TICRR, HELLS, BRCA2, MYBL2</i> |
| GO:0000070 | mitotic sister chromatid segregation | 120       | 62          | 24.47    | 2.20E-14      | 0.00055    | <i>DLGAP5, NDC80, CENPE, NUSAP1, NCAPG, CDC6, SMC2, TNKS, SPAG5, KIF4A, KIF18A, CCNB1, AURKB, NCAPD3, BUB1, MAD2L1, MIS12, GEN1, DSN1, SGO1, KIF14, KIF18B, CDCA8, CHTF8, POGZ, KIFC1, NCAPH, CENPC, SLF1, CDC23</i> |

Statistical evaluation of gene ontology (GO) categories based of the number of significant-to-expected observations using either Fisher's exact test (Fis) or Kolmogorov-Smirnov test (KS). Classic and weight01 algorithms were utilised which do not or do take into account of the structure of the GO hierarchy, respectively. Genes in bold were downregulated under lipoprotein-deplete conditions.

**Supplementary Table S6. Gene ontology analysis of differentially expressed genes in LXR-623 treated SF188 cells.**

| GO.ID      | Term                     | Annotated | Significant | Expected | classicFisher | weight01KS | Genes                                                                                                                                                                                                                   |
|------------|--------------------------|-----------|-------------|----------|---------------|------------|-------------------------------------------------------------------------------------------------------------------------------------------------------------------------------------------------------------------------|
| GO:0051301 | cell division            | 368       | 154         | 83.85    | 7.20E-17      | 1.80E-09   | <i>CCNF, SPC25, KIF20A, HELLS, VEGFA, CCNA2, KIF11, CCNE2, NCAPG, FAM83D, BRIP1, SKA3, BUB1, EREG, NUSAP1, CENPE, ASPM, PLK1, ANLN, CDCA2, NDC80, ESPL1, OIP5, NCAPH, SPC24, CDK2, CCNB1, SKA2, TOP2A, BRCC3, CDC7</i>  |
| GO:0006260 | DNA replication          | 206       | 105         | 46.94    | 4.30E-19      | 4.70E-05   | <i>PCLAF, ESCO2, CHAF1B, CCNE2, BMP4, CLSPN, MCM10, BRIP1, EREG, DTL, GINS3, GINS2, RMI1, MCM5, EXO1, RRM2, GINS1, CDK2, TICRR, MCM3, PCNA, RFC5, CDC7, CDC25C, CCNE1, E2F8, DNA2, GINS4, CDC25A, NASP</i>              |
| GO:0000278 | mitotic cell cycle       | 685       | 275         | 156.08   | 2.50E-26      | 7.30E-05   | <i>SKP2, MKI67, SPC25, ASNS, KIF20A, EDN1, DLGAP5, CCNA2, KIF11, CCNE2, NCAPG, PDGFRB, CDKN2B, BMP4, CLSPN, MCM10, GTSE1, SKA3, BUB1, EREG, NUSAP1, CENPE, PLK1, ANLN, DTL, GINS2, NDC80, MCM5, MYBL2, ESPL1</i>        |
| GO:0007049 | cell cycle               | 1186      | 439         | 270.24   | < 1e-30       | 0.00013    | <i>SKP2, DDIT3, NUPR1, MKI67, PCLAF, CCNF, SPC25, ASNS, KIF20A, PTGS2, EDN1, CENPI, DLGAP5, ESCO2, HELLS, CHAF1B, WDR76, CCNA2, KIF11, CCNE2, NCAPG, FAM83D, PDGFRB, CDKN2B, BMP4, CLSPN, MCM10, BRIP1, GTSE1, SKA3</i> |
| GO:0051726 | regulation of cell cycle | 762       | 261         | 173.63   | 3.10E-14      | 0.0013     | <i>SKP2, DDIT3, NUPR1, MKI67, PCLAF, CCNF, ASNS, PTGS2, EDN1, DLGAP5, WDR76, CCNA2, KIF11, CCNE2, FAM83D, PDGFRB, CDKN2B, BMP4, CLSPN, BRIP1, GTSE1, BUB1, EREG, NUSAP1, CENPE, ASPM, PLK1, ANLN, UIF, DTL</i>          |

Statistical evaluation of gene ontology (GO) categories based of the number of significant-to-expected observations using either Fisher’s exact test (Fis) or Kolmogorov-Smirnov test (KS). Classic and weight01 algorithms were utilised which do not or do take into account of the structure of the GO hierarchy, respectively. Genes in bold were downregulated under lipoprotein-deplete conditions.
